# Supplementary material for: Biomarkers for efficacy of adjuvant chemotherapy following complete resection in NSCLC stages I–IIIA
Source: PubMed Central journal article supplement — Eur Respir Rev. 2015 Jun;24(136):340–55. doi: 10.1183/16000617.00005814 (PMC9487808; doi:10.1183/16000617.00005814), 2015-06
Supplement: ERR-0058-2014_Supplementary_material.pdf [file ERR-0058-2014_Supplementary_material.pdf]

TABLE S1 Predictive impact of patient characteristics in patients treated with resection of tumour or/and adjuvant chemotherapy.

| Author,<br>year               | No.<br>pts. | Treatment                     | Stage | Patient<br>characteristic | Patient<br>characteristic<br>status | Disease free survival |            |              | Overall survival                                  |                                   |              |
|-------------------------------|-------------|-------------------------------|-------|---------------------------|-------------------------------------|-----------------------|------------|--------------|---------------------------------------------------|-----------------------------------|--------------|
|                               |             |                               |       |                           |                                     | Months/<br>HR         | p-value    |              | Months/<br>HR/ 5-<br>year<br>survival<br>(%)      | p-value                           |              |
|                               |             |                               |       |                           |                                     |                       | Univariate | Multivariate |                                                   | Univariate                        | Multivariate |
| <b>Butts et al<br/>2010</b>   | 219         | ACT (CDDP-<br>based) or OP*   | IB    | Tumour size               | Size ≥4 cm ACT<br>vs. OP            | NA                    | NA         | NA           | HR:<br>0.66                                       | 0.13                              | NA           |
|                               |             |                               |       |                           | Size<4cm ACT<br>vs. OP              | NA                    | NA         | NA           | (0.39–<br>1.14)<br>HR:<br>1.73<br>(0.98–<br>3.04) | 0.056<br>(interaction<br>p= 0.02) | NA           |
| <b>Strauss et<br/>al 2008</b> | 196         | ACT<br>(CBDCA+Pacl)<br>or OP* | IB    | Tumour size               | Size ≥4 cm ACT<br>vs. OP            | HR:<br>0.69           | 0.035      | NA           | HR:<br>0.69                                       | 0.042                             | NA           |
|                               |             |                               |       |                           | Size<4cm ACT                        | (0.49–<br>0.97)       | 0.49       | NA           | (0.48–<br>0.99)                                   | 0.32                              | NA           |

| Author,<br>year                | No.<br>pts. | Treatment           | Stage | Patient<br>characteristic | Patient<br>characteristic<br>status | Disease free survival         |         |    | Overall survival                                         |         |    |
|--------------------------------|-------------|---------------------|-------|---------------------------|-------------------------------------|-------------------------------|---------|----|----------------------------------------------------------|---------|----|
|                                |             |                     |       |                           |                                     | Months/<br>HR                 | p-value |    | Months/<br>HR/ 5-<br>year<br>survival<br>(%)             | p-value |    |
|                                |             |                     |       |                           | vs. OP                              | HR:<br>1.01<br>(0.69–<br>1.48 |         |    | HR:1.12<br>(0.75–<br>1.67)                               |         |    |
| <b>Nakagawa<br/>et al 2006</b> | 172         | ACT (UFT) or<br>OP* | I     | Stage                     | T1 ACT vs. OP                       | NA                            | NA      | NA | 87.7% <sup>1</sup><br>vs.                                | 0.014   | NA |
|                                |             |                     |       |                           | T2 ACT vs. OP                       | NA                            | NA      | NA | 56.4% <sup>1</sup><br>vs.<br>58.5%<br>59.4% <sup>1</sup> | 0.763   | NA |
| <b>Nakagawa</b>                | 172         | ACT (UFT) or        | I     | Gender                    | Male ACT vs.                        | NA                            | NA      | NA | 71.6% <sup>1</sup>                                       | 0.013   | NA |

| Author,<br>year                | No.<br>pts. | Treatment                   | Stage       | Patient<br>characteristic | Patient<br>characteristic<br>status | Disease free survival |            |              | Overall survival                             |                                            |              |    |
|--------------------------------|-------------|-----------------------------|-------------|---------------------------|-------------------------------------|-----------------------|------------|--------------|----------------------------------------------|--------------------------------------------|--------------|----|
|                                |             |                             |             |                           |                                     | Months/<br>HR         | p-value    |              | Months/<br>HR/ 5-<br>year<br>survival<br>(%) | p-value                                    |              |    |
|                                |             |                             |             |                           |                                     |                       | Univariate | Multivariate |                                              | Univariate                                 | Multivariate |    |
| <b>et al 2006</b>              |             | OP*                         |             |                           | OP                                  | NA                    | NA         | NA           | vs.                                          | 43.6% <sup>1</sup>                         | 0.850        | NA |
|                                |             |                             |             |                           | Female ACT vs.<br>OP                |                       |            |              |                                              | 78% <sup>1</sup> vs.<br>74.7% <sup>1</sup> |              |    |
| <b>Bennouna<br/>et al 2011</b> | 840         | ACT<br>(CDDP+NVB)<br>or OP* | IB–<br>IIIA | Histology                 | Adenocarcinoma<br>ACT vs. OP        | NA                    | NA         | NA           |                                              | 52.1%<br>vs.                               | NA           | NA |
|                                |             |                             |             |                           | Other ACT vs.<br>OP                 | NA                    | NA         | NA           |                                              | 38.2%<br>50.8%<br>vs. 45%<br>HR:<br>0.71   | NA           | NA |

| Author,<br>year | No.<br>pts. | Treatment | Stage | Patient<br>characteristic | Patient<br>characteristic<br>status | Disease free survival |            |              | Overall survival                             |            |              |
|-----------------|-------------|-----------|-------|---------------------------|-------------------------------------|-----------------------|------------|--------------|----------------------------------------------|------------|--------------|
|                 |             |           |       |                           |                                     | Months/<br>HR         | p-value    |              | Months/<br>HR/ 5-<br>year<br>survival<br>(%) | p-value    |              |
|                 |             |           |       |                           |                                     |                       | Univariate | Multivariate |                                              | Univariate | Multivariate |
|                 |             |           |       |                           |                                     |                       |            |              | (0.52–<br>0.97)                              |            |              |

Abbreviations: No. pts: number of patients, HR: Hazard ratio, ACT: adjuvant chemotherapy, CDDP= cisplatin, OP= complete surgery only, NA: not available, CBDCA: carboplatin, Pacl: Paclitaxel, UFT: uracil-tegafur, NVB: Vinorelbine NA: not available, HR: Hazard ratio. \*Randomized trial. ACT-group and OP-group (control-group). 18-year survival

TABLE S2 Prognostic impact of patient characteristics in patients treated with resection of tumour or/and adjuvant chemotherapy

| Author,<br>year                  | No.<br>pts. | Treatment                   | Stage | Patient<br>characteristics | Patient<br>characteristics<br>status | Disease free survival |            |              | Overall survival               |            |              |
|----------------------------------|-------------|-----------------------------|-------|----------------------------|--------------------------------------|-----------------------|------------|--------------|--------------------------------|------------|--------------|
|                                  |             |                             |       |                            |                                      | Months/<br>HR         | p-value    |              | Months/<br>HR                  | p-value    |              |
|                                  |             |                             |       |                            |                                      |                       | Univariate | Multivariate |                                | Univariate | Multivariate |
| <b>Scagliotti<br/>et al 2003</b> | 548         | ACT (CDDP-<br>based) or OP* | I–III | Gender                     | Male                                 | NA                    | NA         | NA           | HR:<br>1.33<br>(1.02–<br>1.72) | NA         | 0.034        |
|                                  |             |                             |       |                            | Female                               | NA                    |            | NA           |                                | NA         |              |

| Author,<br>year                  | No.<br>pts. | Treatment                   | Stage | Patient<br>characteristics | Patient<br>characteristics<br>status | Disease free survival      |                                    |      | Overall survival               |                                    |    |       |
|----------------------------------|-------------|-----------------------------|-------|----------------------------|--------------------------------------|----------------------------|------------------------------------|------|--------------------------------|------------------------------------|----|-------|
|                                  |             |                             |       |                            |                                      | Months/<br>HR              | p-value<br>Univariate Multivariate |      | Months/<br>HR                  | p-value<br>Univariate Multivariate |    |       |
|                                  |             |                             |       |                            |                                      |                            |                                    |      | 1                              |                                    |    |       |
| <b>Kato et al<br/>2004</b>       | 999         | ACT (UTF) or<br>OP*         | I     | Gender                     | Female                               | NA                         | NA                                 | NA   | HR:<br>0.66<br>(0.48–<br>0.91) | NA                                 | NA | 0.01  |
|                                  |             |                             |       |                            | Male                                 | NA                         | NA                                 | NA   | 1                              | NA                                 | NA | NA    |
| <b>Takenaka<br/>et al 2010</b>   | 122         | ACT (FU) or<br>OP**         | I–III | Gender                     | Male                                 | HR: 5.4<br>(1.61–<br>18.2) | NA                                 | 0.03 | NA                             | NA                                 | NA | NA    |
|                                  |             |                             |       |                            | Female                               | 1                          | NA                                 | NA   | NA                             | NA                                 | NA | NA    |
| <b>Scagliotti<br/>et al 2003</b> | 548         | ACT (CDDP-<br>based) or OP* | I–III | Stage                      | III                                  | 2.94<br>(2.39–<br>3.53)    | 0.001                              | NA   | HR:<br>3.19<br>(2.59–<br>3.93) | NA                                 | NA | 0.001 |
|                                  |             |                             |       |                            | I                                    | 1                          |                                    | NA   | 1                              |                                    |    |       |

| Author, year                | No. pts. | Treatment                                 | Stage   | Patient characteristics | Patient characteristics status | Disease free survival |            |              | Overall survival |            |              |
|-----------------------------|----------|-------------------------------------------|---------|-------------------------|--------------------------------|-----------------------|------------|--------------|------------------|------------|--------------|
|                             |          |                                           |         |                         |                                | Months/HR             | Univariate | Multivariate | Months/HR        | Univariate | Multivariate |
| <b>Douillard et al 2006</b> | 407      | ACT (CDDP+NVB) or OP*                     | I– IIIA | Stage                   | IIIA                           | NA                    | NA         | NA           | HR: 0.64 (0.52–  | NA         | 0.001        |
|                             |          |                                           |         |                         | I–II                           | NA                    | NA         | NA           | 0.78)            | NA         |              |
| <b>Yan et al 2010</b>       | 151      | ACT (Pacl-, Gem-, NVB- or Doc- based) *** | I–III   | Stage                   | III                            | HR: 1.688 (1.291–     | NA         | 0.001        | NA               | NA         | NA           |
|                             |          |                                           |         |                         | I–II                           | 2.208)                | NA         | NA           | NA               | NA         |              |
| <b>Takenaka et al 2010</b>  | 122      | ACT (FU) or OP**                          | I–III   | Stage                   | III                            | HR: 9.4 (4.2–         | NA         | 0.001        | HR: 13.7 (4.3–   | NA         | 0.001        |
|                             |          |                                           |         |                         | I–II                           | 21.4)                 | NA         | 44.1)        | NA               |            |              |

| Author,<br>year                | No.<br>pts. | Treatment                                         | Stage | Patient<br>characteristics | Patient<br>characteristics<br>status | Disease free survival |              |        | Overall survival |              |       |
|--------------------------------|-------------|---------------------------------------------------|-------|----------------------------|--------------------------------------|-----------------------|--------------|--------|------------------|--------------|-------|
|                                |             |                                                   |       |                            |                                      | Months/<br>HR         | p-value      |        | Months/<br>HR    | p-value      |       |
|                                |             |                                                   |       |                            |                                      | Univariate            | Multivariate |        | Univariate       | Multivariate |       |
| <b>Kato et al<br/>2004</b>     | 999         | ACT (UTF) or<br>OP*                               | I     | T-stage                    | T2                                   | NA                    | NA           | NA     | HR:<br>1.95      | NA           | 0.001 |
|                                |             |                                                   |       |                            | T1                                   | NA                    | NA           | NA     | (1.41–<br>2.69)  | NA           |       |
| <b>Yan et al<br/>2010</b>      | 151         | ACT (Pacl-,<br>Gem-, NVB-<br>or Doc-<br>based)*** | I–III | Histology                  | Adenocarcinoma                       | HR:<br>2.14           | NA           | 0.001  | NA               | NA           | NA    |
|                                |             |                                                   |       |                            | Other                                | (1.37–<br>3.37)       | NA           | NA     | NA               | NA           |       |
| <b>Shi et al<br/>2011</b>      | 144         | ACT (Pacl-,<br>Gem-, NVB-<br>or Doc- based)<br>** | I–III | Histology                  | Adenocarcinoma                       | 15.7                  | 0.006        | 0.0001 | NA               | NA           | NA    |
|                                |             |                                                   |       |                            | Other                                | 48.2                  | HR: 2.9      | NA     | NA               | NA           |       |
| <b>Takenaka<br/>et al 2010</b> | 122         | ACT (FU) or<br>OP**                               | I–III | Histology                  | Adenocarcinoma                       | HR:<br>0.42           | 0.04         | 0.25   | NA               | NA           | NA    |

| Author,<br>year                 | No.<br>pts. | Treatment                   | Stage      | Patient<br>characteristics | Patient<br>characteristics<br>status | Disease free survival |         |    | Overall survival |         |        |
|---------------------------------|-------------|-----------------------------|------------|----------------------------|--------------------------------------|-----------------------|---------|----|------------------|---------|--------|
|                                 |             |                             |            |                            |                                      | Months/<br>HR         | p-value |    | Months/<br>HR    | p-value |        |
|                                 |             |                             |            |                            | Other                                | (0.18–<br>0.94)       |         |    | NA               | NA      | NA     |
| <b>Nakagawa<br/>et al 2006</b>  | 172         | ACT (UFT) or<br>OP*         | I          | Age                        | ≥60 years                            | NA                    | NA      | NA | HR:<br>2.24      | NA      | 0.0053 |
|                                 |             |                             |            |                            | <60 years                            | NA                    | NA      | NA | (1.26–<br>4.20)  | NA      |        |
| <b>Kato et al<br/>2004</b>      | 999         | ACT (UTF) or<br>OP*         | I          | Age                        | ≥65 years                            | NA                    | NA      | NA | HR:2.02          | NA      | 0.001  |
|                                 |             |                             |            |                            | <65 years                            | NA                    | NA      | NA | (1.46–<br>2.80)  | NA      |        |
| <b>Douillard<br/>et al 2006</b> | 407         | ACT<br>(CDDP+NVB)<br>or OP* | I–<br>IIIA | Age                        | <55 years                            | NA                    | NA      | NA | HR:<br>0.76      | NA      | 0.005  |
|                                 |             |                             |            |                            | ≥55 years                            | NA                    | NA      | NA | (0.62–<br>0.93)  | NA      |        |
|                                 |             |                             |            |                            |                                      |                       |         |    | 1                |         |        |



Abbreviations: No. pts: number of patients, HR: Hazard ratio, ACT: adjuvant chemotherapy, CDDP= cisplatin, OP= complete surgery only, NA: not available, UFT: uracil-tegafur, FU: Fluorouracil, NVB: Vinorelbine, Pacl: Paclitaxel, Gem: Gemcitabine, Doc: Docetaxel. \*Randomized trial. ACT-group and OP-group (control-group). \*\* Not randomized patients. ACT-group and OP-group (control-group). \*\*\* Not randomized patients. Only ACT-patients.

## References

Butts CA., Ding K., Seymour L., *et al.* Randomized phase III trial of vinorelbine plus cisplatin compared with observation in completely resected stage IB and II non-small-cell lung cancer: updated survival analysis of JBR-10. *J Clin Oncol* 2010; 28: 29–34.

Strauss GM., Herndon JE 2nd., Maddaus MA., *et al.* Adjuvant paclitaxel plus carboplatin compared with observation in stage IB non-small-cell lung cancer: CALGB 9633 with the Cancer and Leukemia Group B, Radiation Therapy Oncology Group, and North Central Cancer Treatment Group Study Groups. *J Clin Oncol* 2008; 26: 5043–5051.

Nakagawa K., Tada H., Akashi A., *et al.* Randomised study of adjuvant chemotherapy for completely resected p-stage I-IIIa non-small cell lung cancer. *Br J Cancer* 2006; 95: 817–821.

Bennouna J., Senellart H., Hiret S., *et al.* Impact of histology on survival of resected non-small cell lung cancer (NSCLC) receiving adjuvant chemotherapy: subgroup analysis of the adjuvant vinorelbine (NVB) cisplatin (CDDP) *versus* observation in the ANITA trial. *Lung Cancer* 2011; 74: 30–34.

Scagliotti GV., Fossati R., Torri V., *et al.* Randomized study of adjuvant chemotherapy for completely resected stage I, II, or IIIA non-small-cell lung cancer. *J Natl Cancer Inst* 2003; 95: 1453–1461.

Kato H., Ichinose Y., Ohta M., *et al.* A randomized trial of adjuvant chemotherapy with uracil-tegafur for adenocarcinoma of the lung. *N Engl J Med* 2004; 350: 1713–1721.

Takenaka T., Yano T., Kiyohara C., *et al.* Effects of excision repair cross-complementation group 1 (ERCC1) single nucleotide polymorphisms on the prognosis of non-small cell lung cancer patients. *Lung Cancer* 2010; 67: 101–107.

Douillard JY., Rosell R., De Lene M., *et al.* Adjuvant vinorelbine plus cisplatin *versus* observation in patients with completely resected stage IB-III A non-small-cell lung cancer (Adjuvant Navelbine International Trialist Association [ANITA]): a randomised controlled trial. *Lancet Oncol* 2006; 7: 719–727.

Yan S., Shun-Chang J., Li C., *et al.* Topoisomerase II alpha expression and the benefit of adjuvant chemotherapy for postoperative patients with non-small cell lung cancer. *BMC Cancer* 2010; 10: 621.

Shi Y., Chen L., Li J., *et al.*: Prognostic and predictive values of pERK1/2 and pAkt-1 expression in non-small cell lung cancer patients treated with adjuvant chemotherapy.: *Tumour Biol* 2011; 32: 381–390.
